# Supplementary material for: Children’s lung function in relation to changes in socioeconomic, nutritional, and household factors over 20 years in Lanzhou
Source: PubMed Central journal article supplement — J Thorac Dis. 2021 Jul;13(7):4574–88. doi: 10.21037/jtd-20-2232 (PMC8339784; doi:10.21037/jtd-20-2232), 2021-07
Supplement: jtd-13-07-4574-dss.pdf [file jtd-13-07-4574-dss.pdf]

## Data Sharing Statement

|                     |                                                                                                                                                    |                                                                                                         |
|---------------------|----------------------------------------------------------------------------------------------------------------------------------------------------|---------------------------------------------------------------------------------------------------------|
| <b>Article Info</b> | <a href="https://dx.doi.org/10.21037/jtd-20-2232">https://dx.doi.org/10.21037/jtd-20-2232</a>                                                      |                                                                                                         |
| <b>Item</b>         | <b>Question</b>                                                                                                                                    | <b>Authors' Response<br/>(place "-" if not applicable)</b>                                              |
| 1                   | Would you like to share data collected for your study to others?                                                                                   | No.                                                                                                     |
| 2                   | If not, would you like to share the reason for your decision?                                                                                      | The data are still under analysis; data need to be further processed to remove subject identifications. |
| 3                   | What data in particular will be shared?                                                                                                            | Data with ID information removed to be shared upon the request made to the corresponding authors.       |
| 4                   | Any other documents will be share? Such as study protocol, statistical analysis plan, informed consent form, clinical study report, analytic code. | Yes, the questionnaire, study protocol, and consent form could be shared.                               |
| 5                   | When will data availability begin?                                                                                                                 | -                                                                                                       |
| 6                   | When will data availability end?                                                                                                                   | -                                                                                                       |
| 7                   | To whom will you share the data?                                                                                                                   | The public.                                                                                             |
| 8                   | For what type of analysis or purpose?                                                                                                              | Scientific research.                                                                                    |
| 9                   | How or where can the data/documents be obtained?                                                                                                   | Contact with the corresponding author: duan_jasmine@126.com.                                            |
| 10                  | Any other restrictions?                                                                                                                            | The original data shall not be disclosed without the consent with the corresponding author.             |
